# Supplementary material
Source: PubMed Central journal article supplement (PMC8515107)
Supplement: jech-2021-216405supp001.pdf [file jech-2021-216405supp001.pdf]

**Supplementary Figure S1. Percent distribution of clinical vulnerability to Covid-19 by age-groups and gender**

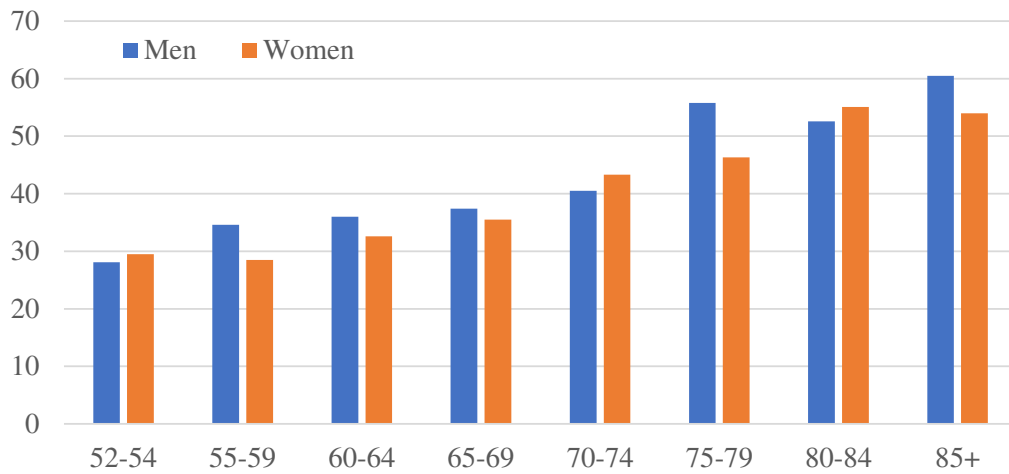

Source: ELSA, Covid-19 sub-study Wave 1 (June/July 2020) and Wave 9 (2018/19). Own calculations, weighted data.

**Supplementary Table S1. Fully adjusted ORs (with 95% Confidence Intervals -CIs) for the relationship between socio-economic and demographic characteristics and clinical vulnerability during the Covid-19 pandemic**

|                          | Unadjusted Model |              | Fully adjusted Model |              |
|--------------------------|------------------|--------------|----------------------|--------------|
|                          | OR               | 95% CIs      | OR                   | 95% CIs      |
| 52-59                    | <b>0.52</b>      | (0.43; 0.63) | <b>0.43</b>          | (0.35; 0.55) |
| 60-69                    | <b>0.64</b>      | (0.55; 0.76) | <b>0.61</b>          | (0.51; 0.72) |
| 70-79                    | Ref              |              | Ref                  |              |
| 80 and older             | <b>1.47</b>      | (1.23; 1.75) | <b>1.29</b>          | (1.07; 1.55) |
| Female                   | 0.94             | (0.82; 1.08) | <b>0.81</b>          | (0.70; 0.94) |
| Non white                | <b>1.62</b>      | (1.14; 2.31) | <b>1.57</b>          | (1.05; 2.34) |
| Married/Partnered        | Ref              |              | Ref                  |              |
| No Partner               | <b>1.50</b>      | (1.30; 1.74) | 1.15                 | (0.95; 1.40) |
| N people in Household    |                  |              | 1.04                 | (0.94; 1.16) |
| Education: high          | Ref              |              | Ref                  |              |
| Medium                   | <b>1.49</b>      | (1.25; 1.78) | <b>1.28</b>          | (1.06; 1.55) |
| Low                      | <b>2.56</b>      | (2.10; 3.13) | <b>1.65</b>          | (1.32; 2.07) |
| Highest wealth quintile  | Ref              |              | Ref                  |              |
| 4th                      | <b>1.26</b>      | (1.03; 1.54) | 1.09                 | (0.88; 1.35) |
| 3rd                      | <b>1.64</b>      | (1.34; 2.00) | <b>1.31</b>          | (1.05; 1.62) |
| 2nd                      | <b>2.07</b>      | (1.66; 2.57) | <b>1.54</b>          | (1.21; 1.96) |
| Lowest                   | <b>2.62</b>      | (2.07; 3.31) | <b>2.30</b>          | (1.76; 3.01) |
| Income                   | <b>0.82</b>      | (0.77; 0.87) | <b>0.93</b>          | (0.89; 0.98) |
|                          |                  |              |                      |              |
| <i>Total Respondents</i> |                  | 5,585        |                      | 5,402        |

Source: ELSA, Covid-19 Substudy Wave 1 (June/July 2020) and Wave 9 (2018/19). Own calculations, weighted data. Results in bold are significant at a 5% level.

**Supplementary Table S2. Fully adjusted ORs and  $\beta$  coefficients [with 95% Confidence Intervals] for the pre-pandemic relationship between clinical vulnerability to Covid-19 (CV) and health, controlling for socio-economic and demographic characteristics.**

|                      | Poor SRH                           | Physical inactive                  | Depressed                          | QoL <sup>+</sup> (CASP-12)             | Happiness <sup>+</sup>                 | Satisfaction <sup>+</sup>              | Anxiety <sup>+</sup>                   |
|----------------------|------------------------------------|------------------------------------|------------------------------------|----------------------------------------|----------------------------------------|----------------------------------------|----------------------------------------|
| <b>Model A</b>       |                                    |                                    |                                    |                                        |                                        |                                        |                                        |
| <b>CV</b>            | 3.61 <sup>***</sup><br>[3.04,4.28] | 2.81 <sup>***</sup><br>[2.33,3.39] | 2.09 <sup>***</sup><br>[1.71,2.55] | -2.43 <sup>***</sup><br>[-2.89,-1.98]  | -0.37 <sup>***</sup><br>[-0.53,-0.21]  | -0.57 <sup>***</sup><br>[-0.74,-0.39]  | -0.50 <sup>***</sup><br>[-0.70,-0.29]  |
| <b>Model B</b>       |                                    |                                    |                                    |                                        |                                        |                                        |                                        |
| <b>50-59, not CV</b> | 0.66 <sup>*</sup><br>[0.45,0.95]   | 0.62 <sup>*</sup><br>[0.41,0.96]   | 1.06<br>[0.73,1.55]                | 0.116<br>[-0.53,0.76]                  | -0.457 <sup>***</sup><br>[-0.69,-0.22] | -0.270 <sup>*</sup><br>[-0.51,-0.03]   | -0.497 <sup>**</sup><br>[-0.81,-0.18]  |
| <b>60-69, not CV</b> | 0.91<br>[0.67,1.22]                | 0.81<br>[0.57,1.15]                | 1.00<br>[0.72,1.38]                | 0.555 <sup>*</sup><br>[0.07,1.04]      | -0.141<br>[-0.32,0.04]                 | -0.113<br>[-0.30,0.08]                 | -0.007<br>[-0.24,0.23]                 |
| <b>70-79, not CV</b> | <i>Ref.</i>                        | <i>Ref.</i>                        | <i>Ref.</i>                        | <i>Ref.</i>                            | <i>Ref.</i>                            | <i>Ref.</i>                            | <i>Ref.</i>                            |
| <b>80+, not CV</b>   | 1.63 <sup>**</sup><br>[1.15,2.30]  | 4.23 <sup>***</sup><br>[2.96,6.05] | 1.27<br>[0.84,1.91]                | -1.636 <sup>***</sup><br>[-2.38,-0.89] | -0.067<br>[-0.34,0.21]                 | -0.082<br>[-0.37,0.21]                 | 0.021<br>[-0.34,0.38]                  |
| <b>50-59, CV</b>     | 2.57 <sup>***</sup><br>[1.76,3.75] | 1.66 <sup>*</sup><br>[1.06,2.60]   | 2.45 <sup>***</sup><br>[1.62,3.71] | -2.047 <sup>**</sup><br>[-3.27,-0.83]  | -0.842 <sup>***</sup><br>[-1.25,-0.44] | -1.006 <sup>***</sup><br>[-1.46,-0.55] | -0.767 <sup>**</sup><br>[-1.30,-0.23]  |
| <b>60-69, CV</b>     | 3.57 <sup>***</sup><br>[2.72,4.69] | 3.07 <sup>***</sup><br>[2.21,4.25] | 2.56 <sup>***</sup><br>[1.86,3.51] | -2.423 <sup>***</sup><br>[-3.12,-1.73] | -0.545 <sup>***</sup><br>[-0.79,-0.30] | -0.771 <sup>***</sup><br>[-1.04,-0.50] | -0.894 <sup>***</sup><br>[-1.23,-0.56] |
| <b>70-79, CV</b>     | 3.87 <sup>***</sup><br>[3.02,4.96] | 3.33 <sup>***</sup><br>[2.47,4.47] | 1.78 <sup>***</sup><br>[1.32,2.40] | -2.196 <sup>***</sup><br>[-2.76,-1.63] | -0.347 <sup>***</sup><br>[-0.55,-0.15] | -0.287 <sup>**</sup><br>[-0.49,-0.08]  | -0.269<br>[-0.55,0.01]                 |
| <b>80+ , CV</b>      | 3.48 <sup>***</sup><br>[2.56,4.72] | 6.41 <sup>***</sup><br>[4.57,9.01] | 1.55 <sup>*</sup><br>[1.08,2.25]   | -3.711 <sup>***</sup><br>[-4.49,-2.93] | -0.391 <sup>**</sup><br>[-0.66,-0.12]  | -0.621 <sup>***</sup><br>[-0.93,-0.31] | -0.401 <sup>*</sup><br>[-0.79,-0.01]   |
| <i>Obs</i>           | <i>5318</i>                        | <i>5406</i>                        | <i>5311</i>                        | <i>5005</i>                            | <i>4836</i>                            | <i>4954</i>                            | <i>4914</i>                            |

Source: ELSA, Covid-19 Substudy Wave 1 (June/July 2020) and Wave 9 (2018/19). All models controls for gender, ethnicity, partnership status, number of respondents in the household, education, wealth quintiles, income, and (Model A only) age-groups. Notes: SRH= Self-Rated Health; + Asked in the self-reported questionnaire. All continuous measures are coded such that higher values mean better outcomes. Values in brackets show the 95% confidence intervals. \* p < 0.05, \*\* p < 0.01, \*\*\* p < 0.001. Own calculations, weighted data.

**Supplementary Table S3. Fully adjusted ORs and  $\beta$  coefficients [with 95% Confidence Intervals] of the pre-pandemic relationship between clinical vulnerability to Covid-19 (CV) and social well-being, controlling for socio-economic and demographic characteristics.**

|                      | Voluntary work         | High Loneliness <sup>+</sup> | < weekly contacts (phone) <sup>+</sup> | < weekly contacts (text/email) <sup>+</sup> | Received formal help <sup>^</sup> |
|----------------------|------------------------|------------------------------|----------------------------------------|---------------------------------------------|-----------------------------------|
| <b>Model A</b>       |                        |                              |                                        |                                             |                                   |
| <b>CV</b>            | 0.91<br>[0.77,1.07]    | 1.45***<br>[1.20,1.76]       | 1.11<br>[0.94,1.32]                    | 0.98<br>[0.82,1.16]                         | 1.97***<br>[1.10,1.83]            |
| <b>Model B</b>       |                        |                              |                                        |                                             |                                   |
| <b>50-59, not CV</b> | 0.40***<br>[0.30,0.54] | 1.53*<br>[1.10,2.15]         | 0.80<br>[0.61,1.04]                    | 0.36***<br>[0.27,0.48]                      | 0.24**<br>[0.08,0.71]             |
| <b>60-69, not CV</b> | 0.68***<br>[0.55,0.85] | 1.30<br>[0.97,1.73]          | 1.01<br>[0.81,1.24]                    | 0.57***<br>[0.46,0.71]                      | 0.18***<br>[0.07,0.43]            |
| <b>70-79, not CV</b> | <i>Ref.</i>            | <i>Ref.</i>                  | <i>Ref.</i>                            | <i>Ref.</i>                                 | <i>Ref.</i>                       |
| <b>80+, not CV</b>   | 0.72*<br>[0.54,0.96]   | 1.03<br>[0.70,1.51]          | 0.77<br>[0.55,1.08]                    | 2.00***<br>[1.45,2.76]                      | 5.09***<br>[3.01,8.62]            |
| <b>50-59, CV</b>     | 0.38***<br>[0.24,0.61] | 1.83**<br>[1.18,2.85]        | 1.18<br>[0.80,1.74]                    | 0.36***<br>[0.23,0.56]                      | 1.15<br>[0.46,2.87]               |
| <b>60-69, CV</b>     | 0.66**<br>[0.51,0.84]  | 2.28***<br>[1.70,3.06]       | 1.08<br>[0.83,1.41]                    | 0.59***<br>[0.45,0.77]                      | 1.13<br>[0.60,2.15]               |
| <b>70-79, CV</b>     | 0.88<br>[0.71,1.09]    | 1.46**<br>[1.11,1.93]        | 0.88<br>[0.70,1.11]                    | 0.94<br>[0.75,1.18]                         | 1.56<br>[0.93,2.61]               |
| <b>80+ , CV</b>      | 0.59**<br>[0.43,0.82]  | 1.33<br>[0.94,1.88]          | 0.84<br>[0.60,1.17]                    | 1.78***<br>[1.30,2.45]                      | 5.45***<br>[3.28,9.05]            |
| <i>Obs</i>           | <i>5318</i>            | <i>4996</i>                  | <i>4578</i>                            | <i>4123</i>                                 | <i>5471</i>                       |

Source: ELSA, Covid-19 Substudy Wave 1 (June/July 2020) and Wave 9 (2018/19). All models controls for gender, ethnicity, marital status, education, employment status, income, home tenure, wealth quintiles, and (Model A only) age-groups. Notes: <sup>+</sup>Asked in the self-completion questionnaire. <sup>^</sup>Only asked of respondents who reported at least one difficulty with ADLs, IADLs, or mobility tasks. Values in brackets show the 95% confidence intervals. \* p < 0.05,

\*\* p < 0.01, \*\*\* p < 0.001. Own calculations, weighted data.

**Supplementary Figure S2. Percent distribution of people shielding in June/July 2020 by clinical vulnerability to Covid-19 and age-groups**

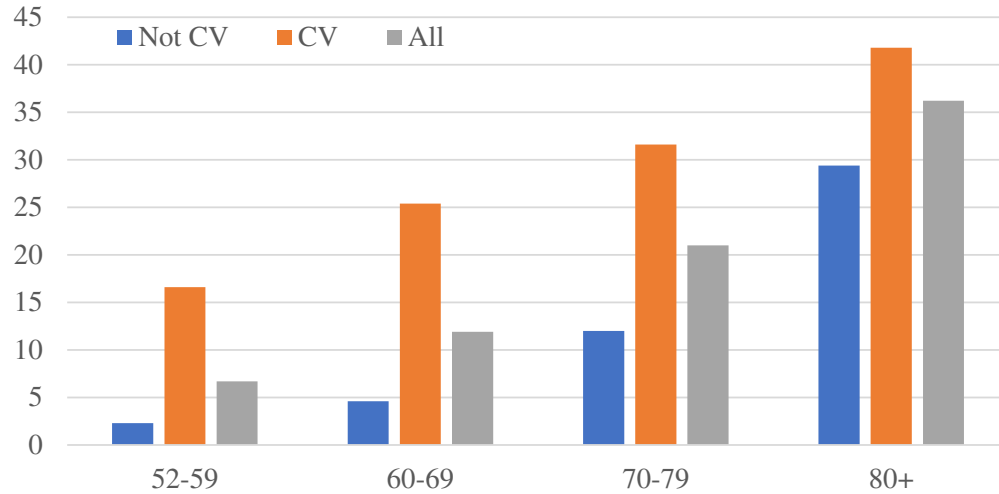

Source: ELSA, Covid-19 sub-study Wave 1 (June/July 2020) and Wave 9 (2018/19). Own calculations, weighted data
